# Supplementary material for: Eleven percent intact PGM3 in a severely immunodeficient patient with a novel splice-site mutation, a case report
Source: Springer Nature journal article supplement (doi:10.1186/s12887-018-1258-9), 2018-08-29
Supplement: MOESM1 [file 16082344]

## Additional information

**Table S1**

**Lab data (age 24 months):**

|                                                                                       | Unit                   | 24 mo, Nov 2015       | Ref interval |
|---------------------------------------------------------------------------------------|------------------------|-----------------------|--------------|
| Hemoglobin                                                                            | g/L                    | 81                    | 105 - 135    |
| Platelets                                                                             | $\times 10^9$ /L       | 456                   | 150 - 350    |
| Leucocytes                                                                            | $\times 10^9$ cells/L  | 5.9                   | 6.0 - 17     |
| Neutrophils                                                                           | $\times 10^9$ cells/L  | 3.5                   | 1.5 - 8.5    |
| Eosinophils                                                                           | $\times 10^9$ cells/L  | 0.67                  | 0.04 - 0.4   |
| Basophils                                                                             | $\times 10^9$ cells/L  | 0.15                  | 0 - 0.1      |
| Monocytes                                                                             | $\times 10^9$ cells/L  | 0.50                  | 0.1 - 1.0    |
| IgG                                                                                   | g/L                    | 15                    | 3.5 - 10.5   |
| IgA                                                                                   | g/L                    | 3.0                   | 0.07 - 0.55  |
| IgM                                                                                   | g/L                    | 1.7                   | 0.27 - 1.2   |
| IgE                                                                                   | kU/L                   | 12,000                | <13          |
| TREC                                                                                  | molecules/miljon cells | 1,020                 | >1,500       |
| CMV IgG                                                                               |                        | +                     |              |
| CMV IgM                                                                               |                        | +                     |              |
| CMV PCR                                                                               |                        | +                     |              |
| EBV IgG                                                                               |                        | +                     |              |
| EBV IgM                                                                               |                        | -                     |              |
| EBV PCR                                                                               |                        | -                     |              |
| <i>In vitro</i> T cell proliferation (PHA, ConA, PPD, candida)                        | % of donors            | All low               |              |
| FASCIA (T cell recall response, PHA, PWM, PPD, TT, candida, influenza, CMV, HSV, VZV) | % of donors            | All low CD4+ and CD8+ |              |
| Complement screening (classical/alternative)                                          |                        | Normal x 2            |              |
| Phagocyte function (DHR assay)                                                        |                        | Normal                |              |
| Anti-TSH receptor ab                                                                  |                        | +                     |              |
| Anti-TPO ab                                                                           |                        | +                     |              |
| TSH and thyroid hormones                                                              |                        | normal                |              |
| <b>Immunophenotype (modified FITMAN-panel)</b>                                        |                        |                       |              |
| Absolute lymphocyte number                                                            | $\times 10^9$ cells/L  | 0.94                  | 1.7 - 6.9    |
| CD3+ cells                                                                            | $\times 10^9$ cells/L  | 0.60                  | 0.9 - 4.5    |
| T cells                                                                               |                        |                       |              |
| CD3+ cells                                                                            | % of lymphocytes       | 64                    | 43 - 76      |
| T cells                                                                               |                        |                       |              |
| CD3-CD19+CD20+                                                                        | $\times 10^9$ cells/L  | 0.18                  | 0.16 - 2.0   |
| B cells                                                                               |                        |                       |              |
| CD3-CD19+CD20+                                                                        | % of lymphocytes       | 20                    | 9 - 24       |
| B cells                                                                               |                        |                       |              |
| CD3-CD56+                                                                             | $\times 10^9$ cells/L  | 0.13                  | 0.1 - 1.0    |
| NK cells                                                                              |                        |                       |              |
| CD3-CD56+                                                                             | % of lymphocytes       | 14                    | 4 - 23       |
| NK cells                                                                              |                        |                       |              |
| <b>CD4+ cells</b>                                                                     |                        |                       |              |
| CD3+CD4+                                                                              | $\times 10^9$ cells/L  | 0.39                  | 0.62 - 0.86  |
| CD3+CD4+                                                                              | % of CD3+              | 65                    | 58 - 70      |
| CD3+CD4+CCR7+45RA+                                                                    | $\times 10^9$ cells/L  | 0.05                  | 0.26 - 0.38  |

|                                                                          |                       |       |             |
|--------------------------------------------------------------------------|-----------------------|-------|-------------|
| Naïve CD4+ T cells                                                       |                       |       |             |
| CD3+CD4+CCR7+45RA+<br>Naïve CD4+ T cells                                 | % of CD3+             | 9     | 22 - 34     |
| CD3+CD4+CCR7+45RA+CD31+<br>CD4+ Recent thymic emigrants                  | $\times 10^9$ cells/L | 0.03  | 0.12 – 0.24 |
| CD3+CD4+CCR7+45RA+CD31+<br>CD4+ Recent thymic emigrants                  | % of CD3+             | 5     | 11 - 19     |
| CD3+CD4+CCR7+45RA-<br>Central memory CD4+ T cells                        | $\times 10^9$ cells/L | 0.13  | 0.20 – 0.34 |
| CD3+CD4+CCR7+45RA-<br>Central memory CD4+ T cells                        | % of CD3+             | 21    | 18 - 27     |
| CD3+CD4+CCR7-45RA+<br>Effector CD4+ T cells                              | $\times 10^9$ cells/L | <0.01 | 0 – 0.02    |
| CD3+CD4+CCR7-45RA+<br>Effector CD4+ T cells                              | % of CD3+             | 1     | 0 - 1       |
| CD3+CD4+CCR7-45RA-<br>Effector memory CD4+ T cells                       | $\times 10^9$ cells/L | 0.19  | 0.11 – 0.22 |
| CD3+CD4+CCR7-45RA-<br>Effector memory CD4+ T cells                       | % of CD3+             | 21    | 11 - 15     |
| CD3+CD4+CCR7+45RA+CD38+HLADR+<br>Activated naïve CD4+ T cells            | $\times 10^9$ cells/L | <0.01 | 0 – 0.01    |
| CD3+CD4+CCR7+45RA+CD38+HLADR+<br>Activated naïve CD4+ T cells            | % of CD3+             | <1    | 0 - 1       |
| CD3+CD4+CCR7+45RA-CD38+HLADR+<br>Activated central memory CD4+ T cells   | $\times 10^9$ cells/L | 4     | 0 - 1       |
| CD3+CD4+CCR7+45RA-CD38+HLADR+<br>Activated central memory CD4+ T cells   | % of CD3+             | 0.02  | 0 - 1       |
| CD3+CD4+CCR7-45RA+CD38+HLADR+<br>Activated effector CD4+ T cells         | $\times 10^9$ cells/L | <0.01 | 0 - 1       |
| CD3+CD4+CCR7-45RA+ CD38+HLADR+<br>Activated effector CD4+ T cells        | % of CD3+             | <1    | 0 - 1       |
| CD3+CD4+CCR7-45RA-CD38+HLADR+<br>Activated effector memory CD4+ T cells  | $\times 10^9$ cells/L | 0.05  | 0 – 0.01    |
| CD3+CD4+CCR7-45RA-CD38+HLADR+<br>Activated effector memory CD4+ T cells  | % of CD3+             | 8     | 0.4 – 0.7   |
| CD3+CD4+CCR7-45RA <sub>low</sub> CD38+HLADR+<br>CD4+ EMRA                | $\times 10^9$ cells/L | <0.01 | 0 - 1       |
| CD3+CD4+CCR7-45RA <sub>low</sub> CD38+HLADR+<br>CD4+ EMRA                | % of CD3+             | 0.26  | 0 – 0.02    |
| CD3+CD4+CCR7+45RA-CXCR3+CCR6-<br>TH1 cells                               | $\times 10^9$ cells/L | 0.14  | 0.13 - 0.21 |
| CD3+CD4+CCR7+45RA-CXCR3+CCR6-<br>TH1 cells                               | % of CD3+             | 24    | 12 - 16     |
| CD3+CD4+CCR7+45RA-CXCR3-CCR6-<br>TH2 cells                               | $\times 10^9$ cells/L | 0.20  | 0.30 – 0.42 |
| CD3+CD4+CCR7+45RA-CXCR3-CCR6-<br>TH2 cells                               | % of CD3+             | 34    | 27 - 37     |
| CD3+CD4+CCR7+45RA-CXCR3-CCR6+<br>TH17 cells                              | $\times 10^9$ cells/L | 0.02  | 0.06 – 0.10 |
| CD3+CD4+CCR7+45RA-CXCR3-CCR6+<br>TH17 cells                              | % of CD3+             | 4     | 5.0 – 7.6   |
| CD3+CD4+CCR4+CD25 <sup>hi</sup> CD127 <sup>low</sup> 45RO-<br>Naïve Treg | $\times 10^9$ cells/L | <0.01 | 0.02 – 0.02 |
| CD3+CD4+CCR4+CD25 <sup>hi</sup> CD127 <sup>low</sup> 45RO-<br>Naïve Treg | % of CD3+CD4+         | <1    | 2.4 – 3.8   |

|                                                                         |                           |       |             |
|-------------------------------------------------------------------------|---------------------------|-------|-------------|
| CD3+CD4+CCR4+CD25hiCD127low45RO+<br>Memory Treg                         | x 10 <sup>9</sup> cells/L | 0.03  | 0.02 – 0.04 |
| CD3+CD4+CCR4+CD25hiCD127low45RO+<br>Memory Treg                         | % of CD3+CD4+             | 8     | 3.4 – 5.4   |
| CD3+CD4+CCR4+CD25hiCD127low45RO-HLADR+<br>Activated naïve Treg          | x 10 <sup>9</sup> cells/L | <0.01 | 0 - 1       |
| CD3+CD4+CCR4+CD25hiCD127low45RO-HLADR+<br>Activated naïve Treg          | % of CD3+CD4+             | <1    | 0 – 0.6     |
| CD3+CD4+CCR4+CD25hiCD127low45RO+HLADR+<br>Activated memory Treg         | x 10 <sup>9</sup> cells/L | 0.02  | 0.01 – 0.02 |
| CD3+CD4+CCR4+CD25hiCD127low45RO+HLADR+<br>Activated memory Treg         | % of CD3+CD4+             | 6     | 1.3 – 2.1   |
| <b>CD8+ cells</b>                                                       |                           |       |             |
| CD3+CD8+                                                                | x 10 <sup>9</sup> cells/L | 0.18  | 0.25 – 0.49 |
| CD3+CD8+                                                                | % of CD3+                 | 30    | 24 - 34     |
| CD3+CD8+CCR7+45RA+<br>Naïve CD8+ T cells                                | x 10 <sup>9</sup> cells/L | <0.01 | 0.07 – 0.13 |
| CD3+CD8+CCR7+45RA+<br>Naïve CD8+ T cells                                | % of CD3+                 | 1     | 6 – 12      |
| CD3+CD8+CCR7+45RA-<br>Central memory CD8+ T cells                       | x 10 <sup>9</sup> cells/L | <0.01 | 0.03 – 0.05 |
| CD3+CD8+CCR7+45RA-<br>Central memory CD8+ T cells                       | % of CD3+                 | <1    | 2.6 – 5.0   |
| CD3+CD8+CCR7-45RA+<br>Effector CD8+ T cells                             | x 10 <sup>9</sup> cells/L | 0.05  | 0.01 – 0.13 |
| CD3+CD8+CCR7-45RA+<br>Effector CD8+ T cells                             | % of CD3+                 | 8     | 2 – 8       |
| CD3+CD8+CCR7-45RA-<br>Effector memory CD8+ T cells                      | x 10 <sup>9</sup> cells/L | 0.09  | 0.06 – 0.10 |
| CD3+CD8+CCR7-45RA-<br>Effector memory CD8+ T cells                      | % of CD3+                 | 15    | 5 - 8       |
| CD3+CD8+CCR7+45RA+CD38+HLADR+<br>Activated naïve CD8+ T cells           | x 10 <sup>9</sup> cells/L | <0.01 | 0 – 1       |
| CD3+CD8+CCR7+45RA+CD38+HLADR+<br>Activated naïve CD8+ T cells           | % of CD3+                 | <1    | 0 – 0.03    |
| CD3+CD8+CCR7+45RA-CD38+HLADR+<br>Activated central memory CD8+ T cells  | x 10 <sup>9</sup> cells/L | <0.01 | 0 – 1       |
| CD3+CD8+CCR7+45RA-CD38+HLADR+<br>Activated central memory CD8+ T cells  | % of CD3+                 | <1    | 0 – 1       |
| CD3+CD8+CCR7-45RA+CD38+HLADR+<br>Activated effector CD8+ T cells        | x 10 <sup>9</sup> cells/L | 0.02  | 0 – 0.01    |
| CD3+CD8+CCR7-45RA+CD38+HLADR+<br>Activated effector CD8+ T cells        | % of CD3+                 | 4     | 0 – 1       |
| CD3+CD8+CCR7-45RA-CD38+HLADR+<br>Activated effector memory CD8+ T cells | x 10 <sup>9</sup> cells/L | 0.05  | 0 – 0.01    |
| CD3+CD8+CCR7-45RA-CD38+HLADR+<br>Activated effector memory CD8+ T cells | % of CD3+                 | 8     | 0 - 1       |
| CD3+CD8+CCR7-45RAlowCD38+HLADR+<br>CD8+ EMRA                            | x 10 <sup>9</sup> cells/L | 0.01  | 0 – 0.01    |
| CD3+CD8+CCR7-45RAlowCD38+HLADR+<br>CD8+ EMRA                            | % of CD3+                 | 2     | 0 – 1       |
| <b>B cells</b>                                                          |                           |       |             |
| CD3-CD19+CD20+CD27-<br>CD24lowCD38lowIgD+IgM+<br>Naïve B cells          | x 10 <sup>9</sup> cells/L | 0.10  | 0.05 – 1.0  |

|                                                                                           |                           |       |             |
|-------------------------------------------------------------------------------------------|---------------------------|-------|-------------|
| CD3-CD19+CD20+CD27-<br>CD24 <sup>low</sup> CD38 <sup>low</sup> IgD+IgM+<br>Naïve B cells  | % of CD19+                | 56    | 32 – 90     |
| CD3-CD19+CD20+CD27-CD24 <sup>hi</sup> CD38 <sup>hi</sup> IgD+IgM+<br>Transitional B cells | x 10 <sup>9</sup> cells/L | 0.03  | 0.01 – 0.05 |
| CD3-CD19+CD20+CD27-CD24 <sup>hi</sup> CD38 <sup>hi</sup> IgD+IgM+<br>Transitional B cells | % of CD19+                | 16    | 4 - 30      |
| CD3-CD19+CD20+CD27+IgD+IgM+<br>Marginal zone-like B cells                                 | x 10 <sup>9</sup> cells/L | <0.01 | 0.01 – 0.25 |
| CD3-CD19+CD20+CD27+IgD+IgM+<br>Marginal zone-like B cells                                 | % of CD19+                | 2     | 2 -20       |
| CD3-CD19+CD20+CD27+IgD-IgM+<br>IgM+ memory B cells                                        | x 10 <sup>9</sup> cells/L | <0.01 | 0 – 0.02    |
| CD3-CD19+CD20+CD27+IgD-IgM+<br>IgM+ memory B cells                                        | % of CD19+                | 2     | 1 - 5       |
| CD3-CD19+CD20+CD27+IgD-IgM-<br>Class switched memory B cells                              | x 10 <sup>9</sup> cells/L | <0.01 | 0.01 – 0.05 |
| CD3-CD19+CD20+CD27+IgD-IgM-<br>Class switched memory B cells                              | % of CD19+                | 4     | 1 – 20      |
| CD3-CD19+CD20-CD38+CD27 <sup>hi</sup><br>Plasmablasts                                     | x 10 <sup>9</sup> cells/L | 0.01  | 0 – 0.04    |
| CD3-CD19+CD20-CD38+CD27 <sup>hi</sup><br>Plasmablasts                                     | % of CD19+                | 6     | 0 - 5       |

**Table S2. Current Gene List for Congenital Immune Defects (N=305)**

|                          |                      |                  |
|--------------------------|----------------------|------------------|
| IBTK                     | NOD2                 | C4B              |
| BTK                      | LPIN2                | C2               |
| IGHM                     | IL1RN                | C3               |
| IGLL1 (λ5)               | RBCK1 / HOIL1 / XAP3 | C5               |
| CD79A                    | IL36RN               | C6               |
| CD79B                    | SLC29A3              | C7               |
| BLNK                     | CARD14 (CARMA2)      | C8A              |
| LRRC8A                   | SH3BP2               | C8B              |
| ICOS                     | PSMB8                | C8G              |
| CD19                     | PLCG2                | C9               |
| CD81                     | CECR1 / ADA2         | SERPING1 / C1INH |
| MS4A1 (CD20)             | TAP2                 | CFB              |
| TNFRSF13B (TACI)         | TAP1                 | CFD              |
| TNFRSF13C (BAFF-R)       | TAPBP (Tapasin)      | PFC / CFP        |
| CD21 / CR2               | RFX5                 | CFI              |
| CD40LG                   | RFXAP                | HF1 / CFH        |
| CD40                     | MHC2TA / CIITA       | MBL2             |
| AICDA                    | RFXANK               | MASP1            |
| UNG                      | ORAI1                | MASP2            |
| CARD11/CARMA11/BIMP<br>3 | STIM1                | COLEC11/CLK1     |
| IL21R                    | CD8A                 | CD46             |
| LRBA                     | ZAP70                | PIGA             |
| MOGS                     | RHOH                 | CD59             |
| SPPL2A                   | MSN                  | FCN3             |
| TCF3 / E2A               | PIK3CD               | C1QBP            |
| PIK3R1                   | CTPS1                | CFHR1            |
| TWEAK / TNFSF12          | IKBKB                | CFHR3            |
| NFKB2                    | TRAC                 | THBD             |
| PRKCD                    | MALT1                | TPP2             |
| TRNT1                    | OX40 / TNFRSF4       | IKBKG            |
| CLEC16A                  | ZBTB24 (ICF2)        | NFKBIA           |
| IL21                     | DOCK2                | IRAK4            |
| NOTCH1                   | CTLA4                | MYD88            |
| RTP4                     | CD28                 | CXCR4            |
| MAP3K14                  | NEIL3                | TMC6 / EVER1     |
| MEFV                     | RIPK1                | TMC8 / EVER2     |
| MVK                      | SEC16A               | STAT2            |
| CIAS1 / PYPAF1 /NLRP3    | TFRC                 | RPSA             |
| NALP12 /NLRP12           | MIR181A1             | PBX1             |
| TNFRSF1A                 | C1QA                 | NLK              |
| IL10RA                   | C1QB                 | IRF7             |
| IL10RB                   | C1QC                 | MST1             |
| IL10                     | C1S                  | DKC1             |
| PSTPIP1                  | C1R                  | NOLA3 / NOP10    |
|                          | C4A                  | TERC             |

|                         |                      |                      |
|-------------------------|----------------------|----------------------|
| TINF2                   | TBK1                 | TNFSF11              |
| NHP2                    | STAT3                | TNFRSF11A            |
| RTEL1                   | DOCK8                | TCIRG1               |
| PRF1 (Perforin)         | TYK2                 | OSTM1                |
| UNC13D                  | PGM3                 | CLCN7                |
| STX11                   | UNC119               | SNX10                |
| STXBP2                  | CHS1 / LYST          | PLEKHM1              |
| SH2D1A                  | MYO5A                | CA2                  |
| XIAP                    | RAB27A               | GATA2                |
| ITK                     | AP3B1                | GMCSFR / CSF2RA      |
| CD27 / TNFRSF7          | NKX2-5               | CARD9                |
| ELANE                   | MKL1                 | IL17RA               |
| GFI1 / ZNF163           | PTPN14               | IL17F                |
| HAX1                    | GJC2                 | TRAF3IP2 / ACT1      |
| G6PC3                   | PROX1                | CLEC7A               |
| SLC37A4                 | PIK3CA               | APOL1                |
| P14 / MAPBPIP /         | VEGFC                | RMRP                 |
| LAMTOR2                 | RASA1                | IKZF1 (Ikaros)       |
| TAZ                     | FLT4 / VEGFR3        | STAT5B               |
| COH1 / VPS13B           | GJA1                 | MAGT1                |
| C16orf57 (USB1)         | ITGA9                | WAS                  |
| ITGB2 (CD18)            | TSC1                 | WIPF1                |
| SLC35C1 / FUCT1 (Fucose | PTEN                 | VAV1                 |
| transp.)                | KIF11                | ATM                  |
| KIND3 / KINDLIN3 /      | FOXC2                | MRE11A               |
| FERMT3                  | TSC2                 | NBS1 / NBN           |
| RAC2                    | CCBE1                | RECQL3 / BLM         |
| ACTB                    | SOX18                | DNMT3B               |
| FPR1                    | G6PC (formerly G6PT) | RNF168               |
| CTSC (Cathepsin C)      | ALG1                 | SMARCAL1             |
| CEBPE                   | TCN2                 | SPINK5               |
| SBDS                    | SLC46A1              | SP110                |
| CYBB / p91-PHOX         | MTHFD1               | CHD7                 |
| CYBA / p22-PHOX         | IL12B/23 (p40)       | POLE                 |
| NCF1 / p47-PHOX         | IFNGR1               | TTC7A                |
| NCF2 /p67-PHOX          | IFNGR2               | TPP1                 |
| NCF4 / p40-PHOX         | IRF8                 | TERT                 |
| MPO                     | ISG15                | LCK                  |
| GATA1                   | IL12RB2              | PNP                  |
| CSF3R                   | SLC11A1 / NRAMPT     | STK4                 |
| VPS45                   | SPPL2A               | TNFRSF6 (CD95/Fas)   |
| JAGN1                   | IL12RB1              | TNFSF6 (CD178/FASLG) |
| CD4                     | STAT1                | CASP10               |
| TLR3                    | FCGR3A/CD16B         | CASP8                |
| UNC93B1                 | MCM4                 | NRAS                 |
| TRAF3                   | INO80                | FADD                 |
| TICAM1 / TRIF           | GCCR / NR3C1         | AIRE                 |

FOXP3  
IL2RA  
ITCH  
KRAS  
MUC2  
TMEM173  
FOXN1  
TBX1  
IL2RG  
JAK3  
IL7R  
PTPRC  
CD3D  
CD3E  
CD3G  
CD247  
CORO1A  
RAG1  
RAG2  
DCLRE1C  
LIG4  
LIG1  
PRKDC  
AK2  
ADA  
NHEJ1  
TREX1  
RNASEH2A  
RNASEH2B  
RNASEH2C  
SAMHD1  
ADAR  
ACP





Figure S2

A

Alignment of patient RNA species with partial intron 7 retention

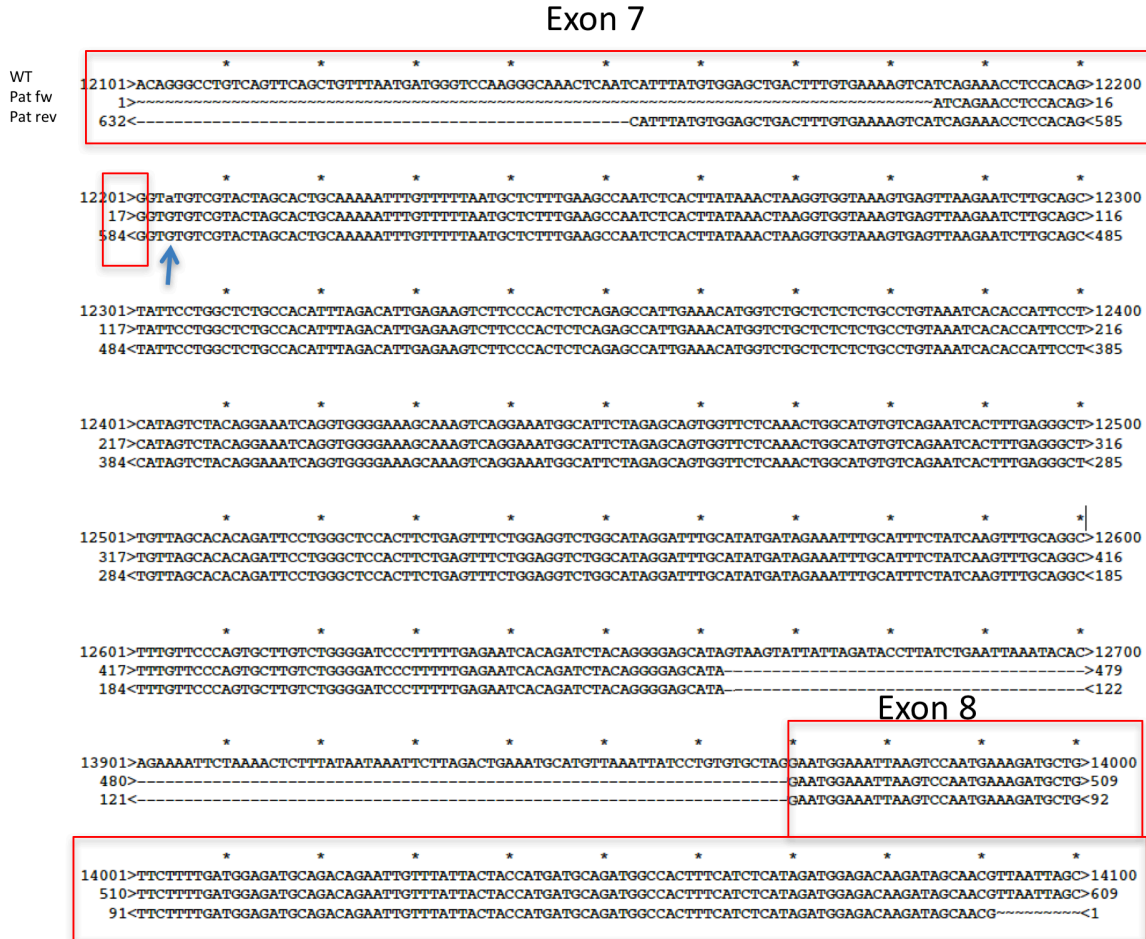

B

Alignment of patient RNA species with wt sequence

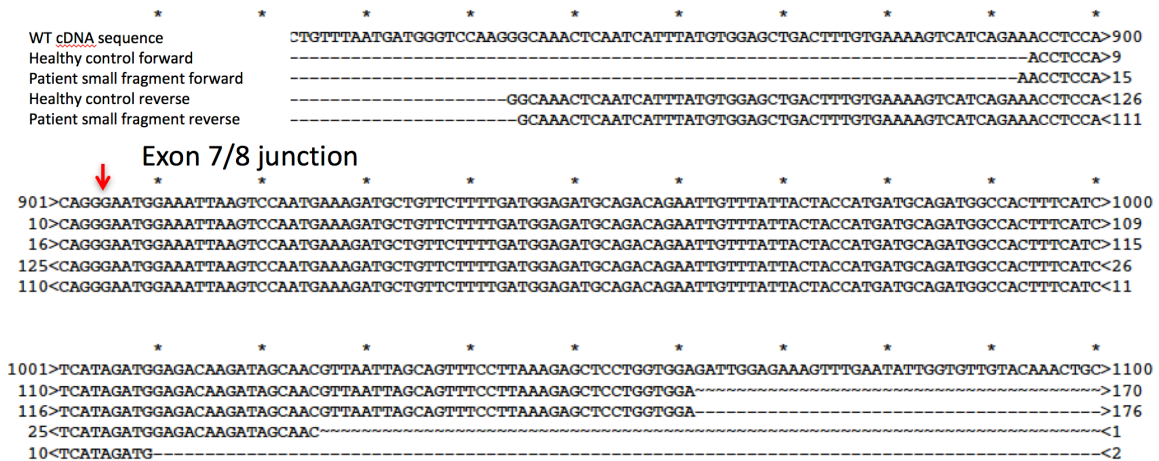

Figure S2. Alignment of the sequence of PCR fragments from patient samples using a forward primer binding in exon 7 and the reverse primer binding in exon 8. A) The sequence of the large PCR fragment with partial intron

7 retention aligned to the genomic sequence. The A>G mutation in the intron sequence is indicated by the arrow. Only the relevant part of intron 7 is included

B) The sequence of the small PCR fragment corresponding to the wt mRNA sequence. The exon 7/8 junction is indicated by the red arrow.

**Figure S3**

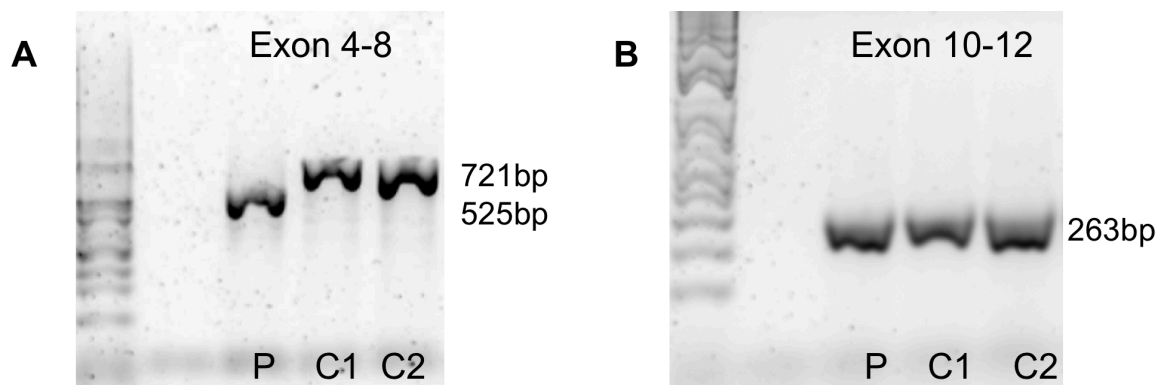

**Figure S3. RT-PCR performed on mRNA from peripheral blood and EBV-transformed B-cells.** Agarose gel analysis of RT-PCR performed on cDNA from patient cells (P) and from two healthy controls (C1 and C2). The PCRs were performed using A) forward primer in exon 4 and reverse primer in exon 8, B) forward primer in exon 10 and reverse primer in exon 12.

**Figure S4**

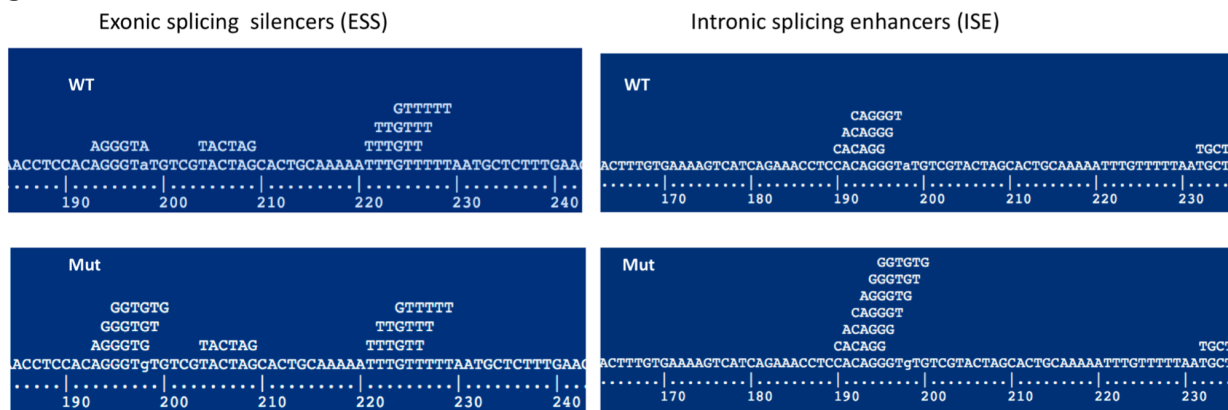

**Figure S4. Identified exonic splicing silencers (ESS) and intronic splicing enhancers (ISE) around the mutation site.** The wild type sequence is shown in the top panels and the patients sequence in the bottom panels. The splice site is in position 196 (GG/GTAT) with the mutated base in lower case. The mutation increase the presence of ESS sites as identified using the on line tool ACESCAN2, <http://genes.mit.edu/cgi-bin/acescan2>.

## MATERIAL AND METHODS

### *Whole exome sequencing*

Genomic DNA was prepared and quantified using Qubit 2.0 Fluorimeter (Invitrogen), fragmented into average 300-bp fragments using E220 focused-ultrasound sonicator (Covaris) and 3 µg of the fragmented DNA was converted into sequencing ready library using SureSelect XT library preparation and the Clinical Research Exome bait set (Agilent Technologies). The obtained library was quantified using Qubit 2.0 and sequenced on HiSeq 2500 (Illumina) in rapid-run mode. Paired end sequencing was carried out to yield 85 M read pairs corresponding to an average coverage of 250x.

Bioinformatic analysis of the sequence data was carried out using v1.5.6 of Mutation Identification Pipeline (MIP) [1]. MIP aligns the sequence reads, calls variants and annotates the variants with information from several databases. MIP then considers the annotated information and the genetic inheritance pattern when calculating a rank score for each variant. For clinical interpretation, the variants are sorted according to the rank score and assessed in decreasing order. The sequence reads were aligned to the whole human genome reference GRCh37 using Mosaic (v.2.2.3) and PCR and optical duplicates were marked using PicardTools (Picard 2013, <http://picard.sourceforge.net/>). GATK v.2.8-1 performed realignment, base recalibration, and variant identification [2]. The results were uploaded to a browser-based tool (Scout, in-house developed at Clinical Genomics facility at Science for Life Laboratory, Stockholm, Sweden) for clinical variant interpretation. The clinical interpretation was restricted to 305 genes associated to immunodeficiency and auto-inflammatory diseases (Supplementary Table S1).

### *Sanger sequencing*

The following primers were designed to amplify a DNA sequence including the variant.

PGM3-Forward (Fw): CTGTCAAGTTTCAGCTGTTTAATG

PGM3-Reverse(Rv): AGCTGCAAGATTCTTAACCTCAC.

PCR was performed in a volume of 20 µL including 20 ng of DNA, 200 nM of primer and 1x AmpliTaq Gold 360 Master Mix (Thermo Fisher Scientific). After an initial step of 95°C for 7 min, 34 cycles of PCR were conducted with denaturation at 94°C for 30 seconds (sec) followed by annealing at 60°C for 35 sec and elongation at 72°C for 45 sec. The same primers were used for Sanger sequencing in both directions using the BigDye Terminator v3.1 sequencing kit (Thermo Fisher Scientific). The sequencing reaction was purified with the BigDye X Terminator Purification Kit (Thermo Fisher Scientific) according to the manufacturer's instructions, and run on the ABI 3130xl instrument. Results were analyzed using the Sequencing Analysis software (Thermo Fisher Scientific).

### *Establishing Epstein Barr Virus (EBV) transformed B-cells and in vitro cell culturing*

Peripheral blood from the patient and from healthy controls (n=4) were collected in EDTA tubes, diluted 1:2 in RPMI1640 (Life Technologies), with 20 % DMSO, aliquoted in 1.2 ml/tube and frozen at -80 or -150°C until used for further analysis as previously described [3].

To establish EBV cell lines aliquots of frozen whole blood or cells from fresh blood were used. Frozen cells were thawed and washed in RPMI-20% FCS (RPMI-20) containing EDTA, while erythrocytes in freshly retrieved blood were lysed using IO-T3 lyse buffer (Beckman Coulter). Cells were then washed with RPMI-20 medium, counted and re-suspended in filtered EBV B95-8 supernatant (kindly provided by professor Ingemar Ernberg, Karolinska Institutet). Cells, 10<sup>7</sup>/ml, were incubated with virus supernatant at 37° C for 90 min, pelleted, and re-suspended in RPMI-20, supplemented with 10 mM HEPES, 1x PEST (both from Life Technologies), and 1 µg cyclosporin A (Sigma) /ml, and divided in two wells in a U-bottomed 96-well plate. The plates were incubated under normal cell culture conditions (5% CO<sub>2</sub> and 95% humidified atmosphere) for several weeks. Half of the medium in the wells was exchanged every 4-5 days and after 2 weeks the cyclosporin was withdrawn. Control and patient samples were treated in parallel. No EBV transformed cells were recovered from frozen patient samples while easily recovered from all controls.

EBV transformation of fresh unfrozen cells from the patient blood was also tried and then the culture medium was conditioned by adding 50% sterile-filtered (0.2 µm) medium from established normal EBV cell cultures. Under these conditions EBV-transformed cells from the patient sample could eventually be established. Cells were expanded and maintained in RPMI-20 supplemented with 10 mM HEPES and 50 µg/ml Gentamicine (Life Technologies) to provide material for further analyzes.

### *Reverse Transcriptase (RT)-PCR and quantitative RT-PCR*

RNA was extracted from peripheral whole blood and from EBV cells from patient and healthy controls using the Tri-reagent (Sigma) according to the manufacturer's protocol. cDNA was prepared using the High capacity cDNA

Reverse transcription (RT) Kit (Thermo Fisher Scientific) with random primers and 500 ng total RNA in each 20 µL reaction.

For PCR each reaction 1 µL cDNA and 1x AmpliTaq Gold 360 Master Mix were used and the same PCR conditions as described above. Primers binding in exons 4, 5, 7, and 10 combined with Rv primers in exons 4, 8, 10 and 12 were used as indicated in figures.

Quantitative RT-PCR was performed using the Power SYBR Green PCR master mix and a StepOne Plus real time PCR instrument (Applied Biosystems). A primer binding over the exon 7/8 junction (Fw e7/8) was used in combination with the Rv e8 primer to specifically amplify wild type (wt) mRNA. and related to the house keeping gene *HPRT* in order to calculate the relative amount of correctly spliced mRNA.

Primer sequences for RT-PCR:

Fw e 4 5'TGGTTGATCCTTTGGGTGA3'  
Fw e 5 5'GATACCAGGCCAGCAGTGA3'  
Fw e 7 5'GCAAACCTCAATCATTTATGTGG3';  
FW e7/8 junction 5'CCTCCACAGGGAATGGAAA3'  
Fw e 10 5'CACTAAGACTGGTGTAACATTTGC3';  
Rv e4 5'TCACAGCTTCTTTCTCGCTGA3'  
Rv e 8 5'TCCACCAGGAGCTCTTTAA3'  
Rv e 10 5'GTTTTACACCAGTCTTAGTGCAA3'  
Rv e 12 5'TCAAGCCCTTCAGAGCCAA3' .  
Fw HPRT 5'GACTTTGCTTTCCTTGGTCAG  
Rv HPRT 5'GGCTTATATCCAACACTTCGTGGG

#### *Immunoblotting*

Cells were lysed in RIPA buffer (50 mM Tris-HCl, pH 7.4 with 50 mM sodium fluoride, 150 mM sodium chloride, 2 mM EDTA, 1.0% NP-40, 0.5% sodium deoxycholate, and 0.1% sodium dodecyl sulfate (SDS)), supplemented with EDTA-free complete protease inhibitor cocktail (Roche). The lysates were separated on a SDS BIS-TRIS 4-12% polyacrylamide gels (Life Technologies) and blotted to cellulose filter using the iBlot dry blotting system (Life Technologies). Staining for specific proteins was made using rabbit anti-PGM3 (PA5-22353, Thermo Scientific) and mouse anti-actin (A-5441, Sigma) and with the secondary antibodies goat anti-mouse-800CW and goat anti-rabbit-680, respectively (both from LiCor Biosciences). The signals were quantified using the Odyssey imaging system (LiCor Biosciences) and the PGM3 relative to actin levels were calculated.

#### *References*

- [1] H. Stranneheim, M. Engvall, K. Naess, N. Lesko, P. Larsson, M. Dahlberg, R. Andeer, A. Wredenberg, C. Freyer, M. Barbaro, H. Bruhn, T. Emahazion, M. Magnusson, R. Wibom, R.H. Zetterstrom, V. Wirta, U. von Döbeln, A. Wedell, Rapid pulsed whole genome sequencing for comprehensive acute diagnostics of inborn errors of metabolism, *BMC Genomics*, 15 (2014) 1090.
- [2] A. McKenna, M. Hanna, E. Banks, A. Sivachenko, K. Cibulskis, A. Kernytsky, K. Garimella, D. Altshuler, S. Gabriel, M. Daly, M.A. DePristo, The Genome Analysis Toolkit: a MapReduce framework for analyzing next-generation DNA sequencing data, *Genome Res*, 20 (2010) 1297-1303.
- [3] K.E. Lundin, A. Hamasy, P.H. Backe, L.N. Moens, E. Falk-Sorqvist, K.B. Elgstoen, L. Morkrid, M. Bjoras, C. Granert, A.C. Norlin, M. Nilsson, B. Christensson, S. Stenmark, C.I. Smith, Susceptibility to infections, without concomitant hyper-IgE, reported in 1976, is caused by hypomorphic mutation in the phosphoglucomutase 3 (PGM3) gene, *Clin Immunol*, 161 (2015) 366-72.
